# Supplementary material
Source: Springer Nature journal article supplement (https://www.springermedizin.de/resource/supplementary/12957_2014_1693_MOESM1_ESM.pdf/9563256)
Supplement: MOESM1 [file 9563256]

**458 Primary breast Ca. Patients SLN procedure**

**330 P** Lymphoscintigraphy; 295 P just lymphoscint; 35 P lymphoscint.+blue dye

**128 P** Blue dye SLN

**7 P** Lymphoscintigraphy+blue dye. 6 recurrent, 1 second primary ipsilateral breast cancer

**2 P** previous ALND

**5** axillary SLNB

1 internal mammary SLN

1 contralateral axillary SLN (Met +) → Axillary dissection

1 Patient unsuccessful SLN → Axillary dissection

3 ipsilateral SLN; 1 contralateral axilla SLN
